# Supplementary material for: Deferred consent in emergency obstetric research: findings from qualitative interviews with women and recruiters in the ACROBAT pilot trial for severe postpartum haemorrhage
Source: HighWire-hosted journal article supplement (doi:10.1136/bmjopen-2021-054787), 2022-05-01
Supplement: bmjopen-2021-054787supp001_data_supplement.pdf [file bmjopen-2021-054787supp001_data_supplement.pdf]

## APPENDIX A- INTERVIEW SCHEDULE FOR TRIAL PARTICIPANTS

### Pre-interview

- Explain affiliation with the study and the purpose of the interview (*including time-line, topics that will be raised*)
- Explain the PIS and prompt for clarity/questions
- Assurance of confidentiality
- Ask to sign consent form
- Permission to record

### Experience of PPH

- How are you feeling and how has your recovery been going since the birth?
- Are you aware that you developed bleeding during your birth that required blood transfusion?
- Can you tell me, in your own time, about your experience of being treated for this?

### Experience of study recruitment

- *[For intervention site participants]* How did you feel about the order in which the blood products were given, due to the hospital being part of a research study?  
*Further prompts:*
  - Before the birth, were you aware that the hospital was involved in the study and would be providing treatment in a different order than they had done in the past?
  - (If No) How did you feel about finding this out after your treatment had already been received?
- *[For control site participants]* How did you feel when the research midwife told you that you had been part of a study because you experienced heavy bleeding during the birth?

- Did you see the poster or leaflet about the study when you were attending the clinic for your antenatal appointments?
- How was your conversation when the research midwife spoke to you about the study?

*Further prompts:*

- What did she explain you were giving consent to?
- Do you think this way of asking you about the research was acceptable? (Why/why not?)
- Did you think the conversation was clear, and simple to understand?
- Did you feel like you were given enough information to help you make a decision about whether you wanted to continue to take part?
- What did you think about the paperwork, or written information you were given?
- Did you have any concerns or questions about continuing to take part?
- What encouraged you to continue to take part in the study?
- Was anyone else involved in your decision about taking part?
- How do you think you would have felt if someone else had given consent on your behalf?
- Do you think it is or is not acceptable for staff to make a decision to involve women in research at the time an emergency is occurring?
- How would you have felt if the study team had collected your data, anonymously, without asking you?

**Acceptability of the study**

- Have you been contacted by the study team since you've left the hospital?  
(If Yes) How did you find that conversation?
- Overall, how would you describe your experience in of taking part in this study so far?
- Are there certain things you think should be changed in terms of how the study is run?

- Do you have any suggestions for how we can help women have a better experience while they are part of the study?
- Have you ever been part of a research study, or know anyone who has?
- If you have taken part in research in the past, how would you compare your experience on this study to the other one? (In what ways were they similar or different?)
- Do you think there are any advantages to being part of a research study?
- Do you think there are any disadvantages to taking part in research?
- Based on your experience, do you think you would participate in another study like this, or recommend it to a friend or family member?
- Do you have any questions, or would you like to add anything else to all you've said today?

### **Conclusion**

- Thank participant for sharing thoughts and experiences
- £10 voucher re-imbursement for time/ travel expenses
- Discuss details of support services to contact/ birth debriefing services
