# Supplementary material for: Deferred consent in emergency obstetric research: findings from qualitative interviews with women and recruiters in the ACROBAT pilot trial for severe postpartum haemorrhage
Source: HighWire-hosted journal article supplement (doi:10.1136/bmjopen-2021-054787), 2022-05-01
Supplement: bmjopen-2021-054787supp002_data_supplement.pdf [file bmjopen-2021-054787supp002_data_supplement.pdf]

## APPENDIX B- INTERVIEW SCHEDULE- RECRUITING STAFF

(General intro question)- **What has your experience been like working on the ACROBAT study?**

### *Prompts*

- How well prepared was your site for the study? Is there something we could do differently to facilitate a) research team readiness and b) clinical staff readiness?
- What were the main challenges you had anticipated before the study?
- Did these challenges change as the study progressed?
- How, in your opinion, did the antenatal information work? Did you get any calls from women who had seen the poster/leaflets?
- What, if anything, could be done differently to improve compliance?

(General question)- **How did you find recruiting participants to the study?**

### *Prompts*

- How did you find identifying eligible participants?
- How long after the birth have you typically been approaching women?
- What have the conversations been like?
- Do you think women understand what they are consenting to at that time?
- What kind of concerns or questions do women have?
- Have women who declined given you a reason why?
- Have partners or family members been present when women are making the decision about taking part?
- Have you recruited any women who do not speak English?
- What has worked well for you with recruitment?

- What has been difficult for recruitment?
- How did women feel about completing the fatigue questionnaire?
- How did the consent for participation in the qualitative study work in your opinion?
- What do you think we can do differently to improve the overall consent rate for the study?
- What are your thoughts about the information materials that women and clinicians see about the study (e.g. the PIS, study posters etc)?

**Do you have any other comments about the ACROBAT study you would like to make?**

For intervention sites:

- Do you think study participants were generally accepting of the study intervention?
